# Supplementary material for: SARS-CoV-2 Neutralizing Antibodies in Mexican Population: A Five Vaccine Comparison
Source: MDPI journal article supplement (doi:10.3390/diagnostics13061194), 2023-03-22
Supplement: s1 [file s1]

**Table S1.** Average of inhibition level by time.

| Average of inhibition level |                 |         |             |         |         |             |
|-----------------------------|-----------------|---------|-------------|---------|---------|-------------|
| Months                      | Pfizer-BioNTech | CanSino | AstraZeneca | Sinovac | Moderna | Total/month |
| 1                           |                 | 97.29   | 95.37       |         | 97.41   | 97.05       |
| 2                           | 96.47           |         |             |         | 98.10   | 96.88       |
| 3                           | 93.17           | 96.15   | 97.24       | 74.06   |         | 92.69       |
| 4                           |                 |         |             | 76.95   |         | 76.95       |
| 5                           | 95.04           |         | 81.44       | 30.90   |         | 92.00       |
| 6                           | 92.72           | 70.85   | 97.24       |         | 97.32   | 80.72       |
| 7                           | 94.57           | 78.94   | 97.18       |         |         | 86.94       |
| 8                           | 72.14           |         |             | 45.95   |         | 63.41       |
| 9                           | 86.65           |         |             |         |         | 86.65       |
| 10                          | 97.29           |         |             |         |         | 97.29       |
| General                     | 92.74           | 79.75   | 85.78       | 75.62   | 97.61   | 88.28       |

**Table S2.** Cross table of effectiveness.

| Pfizer-BioNTech vs CanSino effectiveness |                    |                 |               |
|------------------------------------------|--------------------|-----------------|---------------|
|                                          | Without inhibition | With inhibition | p             |
| Pfizer-BioNTech                          | 0                  | 140             | <b>0.001*</b> |
| CanSino                                  | 6                  | 43              |               |

\*Significance  $p < 0.05$  Chi-squared test
